# Supplementary material
Source: MDPI journal article supplement (https://www.mdpi.com/2227-7102/7/2/63)
Supplement: s1 [file s1]

Type of the Paper (Article.)

The flipped classroom as a pedagogical tool for leadership development in postgraduate medical education

Alicia T. Lucardie1 and Jamiu O. Busari 2,3 *

1 Faculty of Health, Medicine and Life sciences, Maastricht University, The Netherlands; alicialucardie@gmail.com

2 Department of Educational Development and research, Faculty of Health, Medicine and Life sciences, Maastricht University, The Netherlands.; Jamiu.busari@maastrichtuniversity.nl

3 Department of Pediatrics, Zuyderland Medical center, Heerlen; j.busari@zuyderland.nl

***** Correspondence: Jamiu.busari@maastrichtuniveristy.nl; Tel.: +31-455-767-516

Academic Editor: name

Received: date; Accepted: date; Published: date

**Abstract:**

Following a needs assessment among residents, a 10-module leadership curriculum was developed that included health care law and medical errors. An educational intervention using the flipped classroom model (FCM) was developed and we investigated (1) its effectiveness as a teaching method and (2) the degree of knowledge acquisition of the content of the module.

Thirty-four residents were selected using convenience sampling and were divided into an intervention group (n=10) and a control group (n=24). The residents in the intervention group received reading materials and assignments in preparation for two reflective sessions. The control group only received reading material. Multiple-choice questionnaires were used to measure knowledge acquisition. Qualitative interviews were used to assess the perceived effectiveness of the FCM.

Eight residents from the intervention group and 10 from the control group were used for final analysis. A significant improvement was observed in acquired knowledge of health care law and medical errors in the intervention group and the FCM was perceived to be effective in teaching health care law and medical errors.

The FCM was perceived to facilitate residents’ knowledge acquisition and stimulate active learning. Interventions with FCM positively influence residents’ performance and should play more structural roles in postgraduate medical education.

**Keywords:** flipped classroom; medical education; leadership; postgraduate; Millennials; residents; health care law; medical errors.

1. Introduction

In the last decade, an unprecedented change in the need and delivery of health care has pushed the field of medicine into new and undiscovered territory [1–3]. There has been an increase in the consumption of health care services, and the scope and content of the responsibility of physicians as health care providers have shifted [2,4]. The traditional patriarchal physician-patient relationship has also witnessed a transition into the biopsychosocial model of health care delivery, opening the doors for shared decision-making in the management of health care problems [5,6]. This shared decision-making process, however, progresses beyond the interactions at the individual patient-physician level to involve more patient participation. As a result, there is a demand for improved and more complex standards of health care service in addition to the reorganization and redistribution of health care providers' duties and responsibilities [2,7,8]. Consequently, physicians are expected to excel in both their clinical duties as well as in the management of health care processes, often taking up managerial and leadership positions without any formal education [3].

Aware of these changing demands, several (postgraduate) medical institutions and national licensing bodies responded differently in the way they reformed their national training programs [1,2,9–11]. For example, the Accreditation Council for Graduate Medical Education (ACGME) in the USA, formulated six competencies that residents needed to acquire during their residency training [1,12] while the Royal College of Physicians and Surgeons of Canada developed the CanMEDS framework consisting of seven professional competencies [1,2,13]. However, since the inception of the CanMEDS framework, many countries including the Netherlands have embraced this framework in the development of curricula for their undergraduate and postgraduate medical programs [2]. In 2015, the CanMEDS framework underwent its latest revision in which one of the professional competencies, i.e., ‘Manager' was recoined ‘Leader' to better reflect the spectrum of leadership skills and capabilities physicians needed to develop [14-16].

In 2014, a new leadership curriculum for postgraduate medical training programs was developed in our institution at the Faculty of Health, Medicine and Life Sciences at Maastricht University. This curriculum was a product of an extensive needs assessment survey conducted amongst Dutch medical residents and faculty [17–19]. The curriculum comprised of ten topics, ranging from knowledge of the health care system to health care law and medical errors [17]. However, one of the highly-ranked topics from the needs assessment in which residents needed additional training in was ‘medical errors and legal aspects of health care' [19]. It is a given that physicians are confronted with a myriad of legal issues on an almost daily basis. In many of these cases, a lack of knowledge of the applicable laws and regulations exists and in situations where they are present; they are not implemented effectively. It is argued in the literature, that a knowledge gap exists between the concept of the legal aspects of health care and its implementation in postgraduate medical training programs [20]. Furthermore, the attention given to this topic in various undergraduate and graduate medical programs is neither structured nor sufficient to prepare medical trainees well for their future leadership roles.

Therefore, to address this educational need, we decided to develop a training module on health care law and medical errors, which was one of the ten themes identified from the needs assessment survey [17]. In the process, we set out to investigate (1) if the educational intervention would improve the trainees' knowledge of the legal aspects of health care and medical errors and (2) if our chosen educational tool (i.e. flipped classroom) was an effective pedagogical model for teaching Millennial residents.

Our hypothesis was that there would be a higher increase in knowledge for the flipped classroom model group (using an active learning process) when compared to a control group using only passive learning processes. In addition, our second hypothesis was that the flipped classroom model is an effective educational modality to teach health care law and medical errors to Millennial residents.

2. Materials and Methods

**2.1 Study Design**

*Setting and participants.* Residents from clinical-related specialties at Zuyderland hospital in the South of the Netherlands were approached to fill in an online knowledge questionnaire on health care law and medical errors and to participate in a training module on these topics through convenience sampling (email invitation). Convenience sampling is a non-probability sampling method where participants are selected from a convenient, accessible population. Residents who did not apply to participate in the training module were allocated to serve as the control group (see Procedures section below). All residents from Zuyderland hospital in the Netherlands from all years of residency were eligible for inclusion, provided their term of residency did not expire before the end of data collection (at the time of participant selection). There were no explicit exclusion criteria. Ethical approval from Zuyderland Medical Ethics Committee (METC) was sought before the start of the intervention and approved.

*Instructor selection*. Based on the findings of earlier research [1,32], one content and one field expert were recruited to facilitate the training module. Each expert was responsible for one session, i.e. either health care law or medical errors.

*Instructional tools.* In designing this module, we chose to use the flipped classroom as our method of instruction. The background and benefits for choosing this pedagogical tool have been extensively described in a perspective paper we recently published [33]. These included the knowledge of the differing expectations and educational needs of the different generation of learners [5,6] as well as the ability of the flipped classroom to allow students to transition quickly from merely understanding a theoretical subject to higher order cognitive skills [30, 33].

*Content and format of the training module.* Careful attention was paid to both the content and format of the training module prior to implementation [34], ensuring a thorough understanding of the intended learning outcomes (ILOs), preparation materials and exercises, in-class content and the flipped classroom as a viable teaching method [34]. The training module on health care law and medical errors that we designed was based on the method described by Lockyer et al. (2005) [22,34]. Following an extensive needs assessment [17–19], we proceeded to develop the ILOs for both topics. Using Bloom's Taxonomy (revised edition) [28,30], we divided the ILOs into both lower- and higher-order learning activities. The ILOs were designed to provide both teachers and residents with a structured guideline on the aims and expectations of the module (see Intended Learning Outcomes (ILOs), Boxes 1 & 2) [34]. Class time was divided into two sessions of two hours each on the topics of health care law and medical errors. Higher-order active learning strategies such as application and evaluation of knowledge were encouraged through case-based discussion, debate and role-play [22,34].

**Intended Learning Outcomes (ILOs) of the training module**

**Box 1. Cognitions**

| **Training Health Care Law** | **Training Medical Errors/Negligence** |
| --- | --- |
| * remembering, understanding | | |
| Knowledge of the different types of law | The implications of medical incidents and errors for the patient and medical staff |
| Knowledge of health care laws in the Netherlands | The difference between medical incidents, complications, calamities and errors. |
| Knowledge of a disciplinary claim procedure |  |

**Box 2. Cognitive skills**

| **Training Health Care Law** | **Training Medical Errors/Negligence** |
| --- | --- |
| *applying, analysing, evaluating, creating | |
| Evaluate the measures issued by the Medical Disciplinary Council in case studies | (Early) recognition of red flags in the process of care and identification of possible solutions |
| Provide sound judgements in practical situations and adequately apply health care laws to daily practice | Make sounds decisions/judgements on the prevention of medical errors |
| Have the capability to inform both patients and law enforcement adequately | Apply the procedure of reporting a medical incident in a hospital |

*Questionnaire design.* An online multiple-choice questionnaire was designed to assess the knowledge gained in health care law and medical errors. The content of the questionnaire focused on the topics outlined in the ILOs as well as on aspects of the homework and pre-class assignments. The questionnaire was developed by AL and JB together with three content experts in the field of legal aspects of health care and medical errors and an expert in questionnaire design. The initial draft of our pilot questionnaire consisted of 50 items. The reliability and utility of the questionnaire was tested in a pilot study among residents in the departments of Paediatrics and Obstetrics/Gynaecology at Maastricht University Medical Centre (MUMC+) in the Netherlands. Forty-five residents were approached by email (convenience sampling) for this purpose and 15 of them completed and returned the questionnaires as requested (response rate 33.33%). The test of reliability of the 50 multiple choice questions in the original questionnaire initially revealed a Cronbach's alpha of 0.264. This subsequently increased to 0.709 following an iterative stepwise removal of the items to 30.

Feedback (quantitative and qualitative) on the questionnaire’s suitability for testing resident’s knowledge of the topics were obtained from the residents in a separate section of the questionnaire. On a scale of 1-5 (1=very poor; 5=excellent) the content of the questionnaire was scored with an average of 3.69 (range 3-5). The format of the questionnaire was graded with an average of 4.00 (range 3-5). Seven residents found the length of the questionnaire "exactly right", 6 "a bit too long", and two found it "much too long". Open ended questions were also used to solicit their opinions on how the questionnaire could be improved. Only Six residents responded. One suggested that the questions should be shortened and another one felt the number of question too much citing that "there were too many questions, which means you cannot read the content properly and therefore have to scan the question; this influences your outcome". A third resident suggested that supplementary literature to assist in preparation could be helpful. The other three residents did not give direct feedback on the questionnaire. All fifteen of the residents indicated they wanted to follow a training on the topics. The final 30-item questionnaire was uploaded into SurveyMonkey, a web-based questionnaire and survey tool (www.surveymonkey.com).

**2.2 Data Collection**

*Knowledge acquisition.* The 30-item questionnaire was used to test the degree of knowledge acquisition in a pre and post intervention fashion. The items of the questionnaire in the pre- and post-tests were identical but organized in a randomized fashion. Demographic details were also collected.

*Perceived effectiveness of flipped classroom model.* In addition to assessment of knowledge acquistion, the perceived effectiveness of the flipped classroom model in teaching health care law and medical errors was assessed. This was done to gain insight into both the positive and negative aspects of the training module [35]. A series of face-to-face, audio-recorded semi-structured interviews with the participants of the intervention group were held, each interview lasting a maximum of 30 minutes to minimize constraint on residents. The interviews were conducted after the successful completion of the training session [35]. A series of 4-6 questions/topics were designed to guide the interviews (covering strengths and weaknesses for topics central to effectivity such as content, format, and methods of preparation). Written informed consent was given before the start of the interviews. Anonymity and confidentiality were explicitly guaranteed before each interview [35].

**2.3 Procedures**

*General procedure.* The general procedure for this study was based on an earlier pilot study by Berkenbosch et al. (2014) evaluating a practice management training for residents [35]. The online 30-item multiple choice questionnaire assessed the prior knowledge of all residents on the topics of health care law and medical errors, two weeks before the start of the training module. Upon completion of the knowledge questionnaire, homework materials were assigned to both the intervention and control groups, focusing primarily on lower cognitive activities such as remembering and understanding [22].

*Intervention group*. In addition to the baseline homework materials, the intervention group received specific preparatory exercises that included a selection of resources from standard textbooks and research articles that were accessible online. They were also instructed to view preselected (open access) videos online about health care law and medical errors. Specific assignments were given to them to complete based on the video’s they watched and the reading materials they studied.

Following the guided individual activities that the residents were given, they were invited to attend an interactive leadership training module on health care law and medical errors. This module comprised of two separate two-hour sessions of group discussions in which the residents reflected, recreated and reorganized their understanding of the concepts acquired from their individual learning activities. The content experts facilitated these sessions and helped where needed to clarify difficult or confusing concepts. At the end of the module, an evaluation of the sessions was performed to identify how the residents perceived the program and determine the areas that required improvement i.e. learning climate, level of interaction, educational content, quality of instruction/trainers and overall impression of the module. to help improve it. Two weeks after the interactive session, the residents in both groups received the same 30-item multiple choice questionnaire again, with the order of the items randomized. The intervention group was also asked to participate in individual semi-structured interviews, to further investigate their perceived effectiveness of the flipped classroom model of training.

**2.4 Data Analysis**

Analyses were performed using IBM SPSS Statistics version 23. Descriptive analyses of baseline characteristics for all participants were conducted. Non-parametric tests were used to analyze participants' knowledge acquisition. Significance was defined as a p-value greater than 0.10. Qualitative data from the semi-structured interviews were transcribed verbatim, then coded and analyzed appropriately using theoretical coding methods (i.e. open coding, axial coding and selective coding) [35,36].

3. Results

3.1 Baseline characteristics

Ten residents (five from Internal Medicine, two from Paediatrics, and one each from Gastroenterology and Psychiatry) participated in the training module on health care law and medical error (intervention group). The control group consisted of 24 residents (five from Neurology, three each from Surgery and Gynaecology/Obstetrics, two each from Cardiology, Paediatrics and Psychiatry, with Emergency Medicine, Orthopedic Surgery, Plastic Surgery and Radiology each counting one resident). In the intervention group, two residents did not complete the baseline knowledge questionnaire in time and were thus excluded from analyses regarding knowledge acquisition. They did complete the questions regarding baseline characteristics. Of the 24 residents in the control group, fourteen were lost to follow-up and did not complete the post-test. Reasons for not completing the post-test were not given (See Flowchart, Fig 1).

Figure 1: Flowchart of the process of resident selection

**
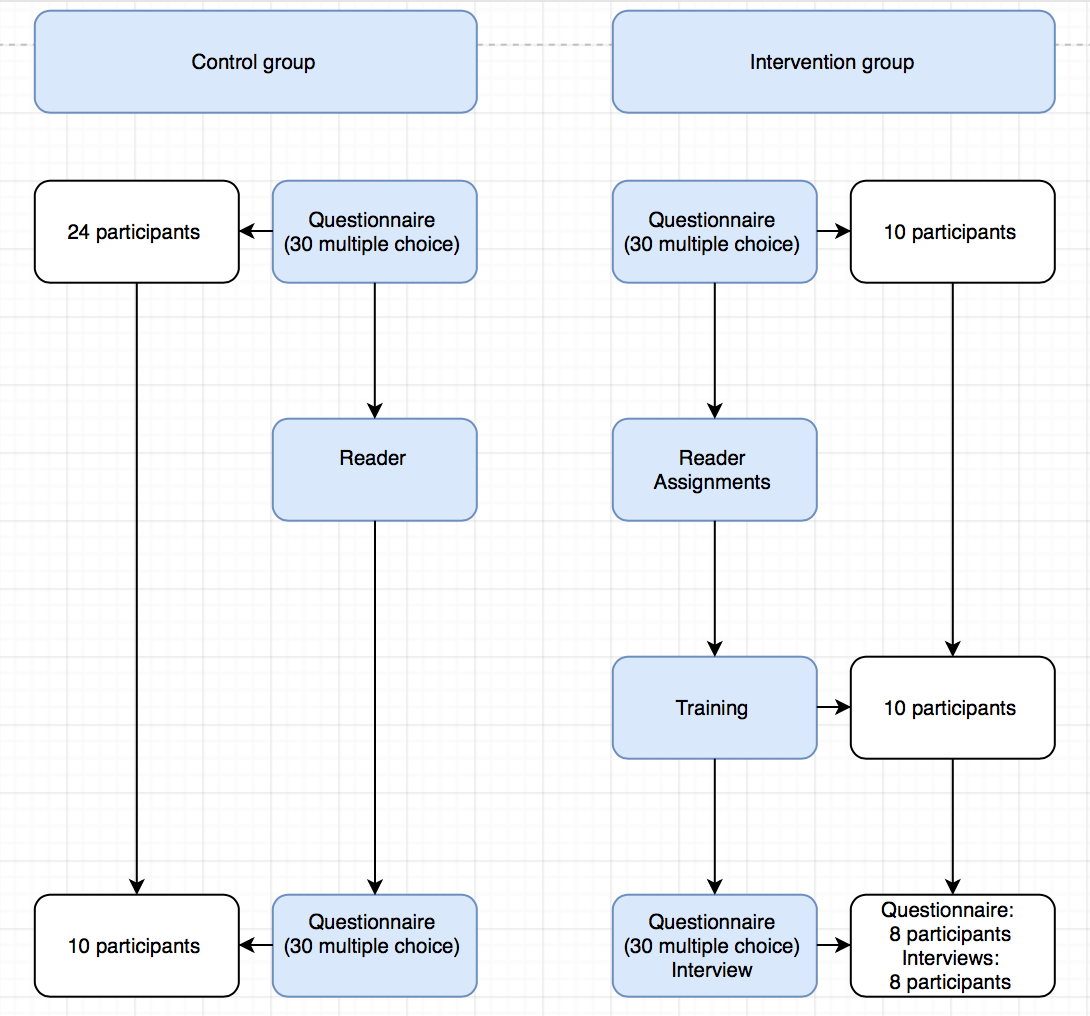
**

The average age in the intervention group was 29.0 years (range 26 – 35 years), comparable to the control group with 28.64 years (range 25 – 35 years). There were more males in the control group compared to the intervention group (41.7% vs. 30.0%). For both groups, all residents had had their basic medical education in the Netherlands, bar one for each group (educated in Belgium). One resident in the control group had had a disciplinary claim and hearing. See Table 1 for descriptive statistics.

Table 1: Baseline characteristics of the residents

|  | Intervention group (n = 10) | Control group (n = 24) |
| --- | --- | --- |
| Average age (years) | 29.00 (26 – 35) | 28.64 (25 – 35) |
| Gender (male) | 3 (30.0%) | 10 (41.7%) |
| Years of experience |  |  |
| < 1 | 1 (10.0%) | 7 (29.2%) |
| 1-2 | 3 (30.0%) | 7 (29.2%) |
| 3-4 | 3 (30.0%) | 7 (29.2%) |
| 5-6 | 2 (20.0%) | 3 (12.5%) |
| > 6 | 1 (10.0%) | 0 (0%) |
| Basic Medical education |  |  |
| Netherlands | 9 (90.0%) | 23 (95.8%) |
| Belgium | 1 (10.0%) | 1 (4.2%) |

3.2 Knowledge Acquisition

From the group of residents who had completed both the pre- and post-test knowledge questionnaire, the residents in the intervention group (n = 8) scored on average 57.14% (95% CI 48.53 – 65.76) for the pre-test. The residents in the control group (n = 10) scored on average 62.78% (95% CI 59.91 – 65.64) for the pre-test. In the intervention group, the average post-test score was 66.67% (95% CI 60.72 – 72.61) compared to the control group 63.67% (95% CI 58.98– 68.36).

The data did not meet the assumptions for normality and homogeneity of variance. Thus, we used the non-parametric Mann-Whitney U test to calculate the average difference between pre- and post-test scores for the intervention group (mean rank 12.43) vs. the control group (mean rank 6.60). The average difference in scores for the intervention group differed significantly compared to the control group (i.e. favoring the intervention group), U = 111.00, z = 1.302, p = 0.019, r = 0.31.

At the end of the post-test, residents were asked to estimate their final grade on a scale of 0 – 10. Interestingly, the average score, shown as a percentage, for the residents in the intervention group was 66.00% (SD 1.26), and the residents in the control group averaged 60.91% (SD 1.30).

The Wilcoxon signed-rank test showed that for the intervention group, the post-test scores (Mdn = 70.00) were not significantly higher than the self-estimated post-test scores (Mdn = 70.00), T = 15.5, p = 0.403, r = 0.26. For the control group, the post-test scores (Mdn = 65.00) also did not significantly differ from the self-estimated post-test scores (Mdn = 60.00), T = 15.5, p = 0.403, r = 0.26.

3.3 Semi-structured interviews

Of the ten residents that participated in the training, eight took part in the interviews that followed. The purpose of the interviews was to assess the perceived effectiveness of the flipped classroom model as well as the quality of the interactive face to face sessions. Two residents were lost to follow-up. One resident cited lack of time; the other left Zuyderland hospital to work at another hospital shortly after the training.

All eight residents highly appreciated the chosen topic for the training. Resident 1 and 3 commented that as a doctor, health care law and medical errors is something you will "probably come in contact with", therefore it is important that you know what you have to do (resident 4 and 5). The fact that two topics were chosen for the module was experienced aa beneficial for inclusion purposes. Essentially because one topic may interest a resident more than another (e.g., health care law is "just really boring to read (about)" (resident 2)), although knowledge of both topics is essential in postgraduate medical education.

The most valued feature of the flipped classroom model was the high degree of interaction that the residents experienced during the two sessions. One of the respondents said that it created an "open atmosphere (enabling us) to talk freely and the facilitator was "instrumental" in the process " (resident 6). They highly appreciated the direct comparison of theoretical concepts to real life practice situations during the face to face interactions. There was also some discussion about the total duration of the training. Three residents would have preferred a longer length of time for the training module. One resident said that "practically one day is easier…but...effectively speaking two afternoons (would be better); it may lead to better retention of the material" (resident 2). Two other residents supported this suggestion. Residents valued the small group size (resident 3 and 6) and the fact that the facilitators were either a content specialist and/or clinician.

Regarding the preparation materials, the residents appreciated receiving content materials ahead of class time (resident 2, 3 and 6). It is "useful to prepare in advance and then build on the topic during class" (resident 2). However, some of them felt that the amount of preparatory reading materials was too much (resident 1 and 8) and would have preferred a few key articles. Both residents admitted having no prior experience with this method of preparation (i.e. selective learning). Six residents would have preferred a longer preparation time, though the time deemed necessary varied from a few days to two weeks. One resident said that he was now used to receiving information "kind of ready-made”, so actively looking up information took some getting used to, even though this should be standard practice" (resident 8). The questionnaire served as a useful tool to trigger the learning process (resident 5 and 7). Two residents preferred reading materials over video, because of practical reasons in the workplace, for example, blocked websites (resident 1 and 5).

Most residents understood how the flipped classroom model differed from Problem Based Learning (PBL), which was regularly used at Maastricht University in the Netherlands (resident 1, 2, 5, 6, 8). Interestingly, one resident (6) mentioned that one of the greatest benefits of the Flipped Classroom compared to PBL was that, "you are informed ahead of time, that these are the important things to pay attention to, these are the definitions…etc. With problem based learning I noticed time and time again that everyone had picked up on something else…so sometimes you completely focused on the wrong things, leaving aside the truly relevant things".

Overall, the residents were very satisfied with both the content and format of the training, bar minor adjustments to the preparation materials and duration of the preparation. In fact, one resident commented that the training module should become a "compulsory element within postgraduate medical education".

4. Discussion

In this study, a training module on health care law and medical errors for Millennial residents was designed using the flipped classroom model. We then set out to investigate if this educational intervention resulted in significant knowledge acquisition of these topics and test if the flipped classroom model was an effective teaching method for this purpose i.e. teaching health care law and medical errors. The results of this study indicate that the flipped classroom model was perceived to be both effective in increasing residents' knowledge of the topic as well as an effective educational tool. Knowledge acquisition was significantly higher in the flipped classroom group, compared to the control group. In addition, the residents valued the training module highly. Central to this were the notable levels of interaction during the training and the direct application of content to the practice setting. The qualitative data also suggest that the flipped classroom model is effective in teaching Millennial residents' health care law and medical errors.

In general, there are multiple advantages to the flipped classroom model. First, the model caters to the educational needs of the individual Millennial student [22,31] through high levels of interaction and collaboration [6]. This was supported by evidence from the semi-structured interviews. Secondly, it allows students select their preferred learning styles and control both time and pace of learning [31]. In essence, it allows the student to take ‘responsibility for their own education' [22,37]. Thirdly, both student-teacher and student-student interaction time are optimized [22]. Also, external experts can be recruited, which would otherwise not have been possible given both time and geographical constraints [22]. Lastly, and most importantly, the model allows for the direct application of newly acquired knowledge to the practical setting, especially in the case of largely theoretical topics such as health care law and medical errors. This is crucial in today's fast-paced, highly complex health care system, where residents must continuously adapt to changing situations.

There are also a few disadvantages to the flipped classroom model. First, it is essential that students have high intrinsic motivation to guard their own educational process [22]. Second, there is a risk of burdening residents with too much reading material [22]. Preparation involves a time investment, which can be challenging in the highly demanding medical setting. The residents in our study echoed this notion, with some preferring less preparation material. Third, it should be noted that the design and development of the training module initially takes a considerable amount of time and effort [22]. However, once trainers are familiarized with the flipped classroom model and a clear framework has been developed, it can be easily re-used for subsequent modules. Regarding the preparatory materials and exercises, there are three potential drawbacks. First, there is the risk of using technology for the sake of technology [21]. This concerns both virtual learning environments (VLEs) and the use of video material. Contrary to popular thought, the driving factor behind the success of the flipped classroom model is not based on the availability and use of pre-recorded video lectures [21,22]. Rather, the role of technological tools lies in supporting a ‘sound pedagogical teaching strategy' [22,38].

Despite the interesting findings in this study there were a few challenges we faced. The first was with the selection of the residents which was based on convenience sampling from a convenient and easily accessible population. Inherent to this method is selection bias, leading to problems with respect to generalization. An advantage with this method however, is that it best reflects the practice situation with differing levels of dedication amongst residents. This could possibly explain the difference in the numbers we lost to follow-up for the intervention group (20.00%) compared to the control group (58.33%) [35]. We assumed that that the less committed residents probably dropped out first [35]. Unfortunately, we do not have data to explain the individual reasons behind the loss to follow-up.

While our results showed a significant difference in knowledge acquisition in favour of the intervention group, the small size of our sample constituted a potential limitation. For example, we needed 21 participants in each arm of our study to detect a large effect with a power of 80% (a = 0.05). Unfortunately, we were only able to allocate 10 residents to the intervention group [35].

Furthermore, the difference in knowledge acquisition between the intervention and control groups could also be attributed to the different amount of exposure to the content, and not necessarily the flipped classroom model itself. For example, assuming both groups spent the same amount of time on the preparation materials, the intervention group had an extra four hours of exposure to the topic content, simply by attending a training. In fact, the results showed that the intervention group spent an average of 2.63 hours (range 0 – 4) on the preparation materials, compared to the control group (0.40 hours; range 0 – 1).

Even though some residents would have preferred the training to have been longer or spread out across multiple days, residents' perception of the training module was very high, and this was reflected in both the group evaluation and during the interviews. Even though this study is preliminary in nature and the results need to be replicated in future studies, we believe the training module could have a lasting impact on residents’ performance (specifically Millennial residents). Future studies would need to focus on increasing sample size and follow-up time, necessary for an increase in reliability and generalization, whilst better evaluating knowledge retention. Other options are to include a second control group to evaluate the effect of exposure to the questionnaire alone or exposing the passive learning control group to a lecture instead of the flipped classroom training. Lastly, we would highly recommend selecting medical specializations individually for participation, to further increase inclusion rates and reduce loss to follow-up. With this study, we believe that the first careful steps toward an effective untangling of the myriad of medical-legal issues for a new generation of doctors have been made. We believe the flipped classroom model is essential in this process and should play a structural role in postgraduate medical education and leadership.

5. Conclusions

In conclusion, we believe that is probably the first educational intervention on teaching health care law and medical errors in postgraduate medical education using the flipped classroom model. There was a significantly larger increase in knowledge acquisition on the topics of health care law and medical errors amongst the residents who participated in the active learning module that used the flipped classroom, compared to the control group that was exposed to a passive learning process (i.e. study materials only). The residents were satisfied with both the content and format of the training module. Overall, the flipped classroom model is effective in teaching health care law and medical errors as part of a comprehensive postgraduate medical leadership module.

**Supplementary Materials:** The following are available online at www.mdpi.com/link, Figure S1: title, Table S1: title, Video S1: title.

**Acknowledgments:** None

**Author Contributions:** AL designed the study, made substantial contribution to the writing of the article, analysis and interpretation of the data, and revision of the article critically for important intellectual content. JOB conceived and designed the study, made substantial contribution to the writing of the article, analysis and interpretation of the data, and revision of the article critically for important intellectual content. All authors read and approved the final manuscript.

**Conflicts of Interest:** The authors declare no conflict of interest.

List of Abbreviations:

ACGME Accreditation Council for Graduate Medical Education

CanMEDS Canadian Medical Education Directives for Specialists

ILOs Intended Learning Outcomes

METC Medical Ethics Committee

VLE Virtual Learning Environment

Ethics approval and consent to participate: Ethical approval from Zuyderland Medical Ethics Committee (METC) was sought prior to the start of the intervention. The METC ruled that ethical approval was not necessary based on the requirements of the Dutch Medical Research (Human Subjects) Act.

Consent for publication: Written informed consent was given before the start of the semi-structured interviews. Anonymity and confidentiality were explicitly guaranteed before each interview.

Appendix A

The appendix is an optional section that can contain details and data supplemental to the main text. For example, explanations of experimental details that would disrupt the flow of the main text, but nonetheless remain crucial to understanding and reproducing the research shown; figures of replicates for experiments of which representative data is shown in the main text can be added here if brief, or as Supplementary data. Mathematical proofs of results not central to the paper can be added as an appendix.

Appendix B

All appendix sections must be cited in the main text. In the appendixes, Figures, Tables, etc. should be labeled starting with ‘A’, e.g., Figure A1, Figure A2, etc.

References

1. Busari JO, Berkenbosch L, Brouns JW. Physicians as managers of health care delivery and the implications for postgraduate medical training: a literature review. Teach Learn Med [Internet]. 2011;23(2):186–96. Available from: http://www.ncbi.nlm.nih.gov/pubmed/21516608

2. Berkenbosch L. Management and leadership education for medical residents. Evaluating needs and developing an educational intervention. In Enschede, The Netherlands: Ipskamp Drukkers BV; 2014.

3. Ackerly D, Sangvai D, Udayakumar K, Shah B, Kalman N, Cho A, et al. Training the Next Generation of Physician–Executives: An Innovative Residency Pathway in Management and Leadership. Acad Med. 2011;86(5):575–9.

4. MacCarrick G. Chapter 1: Introduction. In: Medical Leadership and Management A Case-based Approach. London: Springer-Verlag; 2014.

5. Busari J, Scheele F. Generatieverschillen: Relevant voor de Nederlandse specialistenopleiding. Ned Tijdschr Geneeskd. 2015;159: A8900.

6. Busari JO. The discourse of generational segmentation and the implications for postgraduate medical education. Perspect Med Educ [Internet]. 2013;2(5-6):340–8. Available from: http://www.pubmedcentral.nih.gov/articlerender.fcgi?artid=3824753&tool=pmcentrez&rendertype=abstract

7. Keckley P, Eselius L. 2009 Survey of Health Care Consumers: key findings, strategic implications. Washington DC; 2009.

8. The Royal Dutch Medical Association. Medical Professionalism 2007. 2007.

9. Halpern R, Lee MY, Boulter PR, Phillips RR. A synthesis of nine major reports on physicians' competencies for the emerging practice environment. Acad Med [Internet]. 2001;76(6):606–15. Available from: http://www.ncbi.nlm.nih.gov/pubmed/11401803

10. Severs M, Crane S. Challenges in medical education - What the doctor ordered? Postgrad Med J [Internet]. 2000;76(900):599–601. Available from: http://imp-primo.hosted.exlibrisgroup.com/openurl/44IMP/44IMP_services_page?sid=OVID&isbn=&issn=0032-5473&volume=76&issue=900&date=2000&title=Postgraduate+Medical+Journal&atitle=Challenges+in+medical+education+-+What+the+doctor+ordered?&aulast=Severs+M.

11. Frank JR, Danoff D. The CanMEDS initiative: implementing an outcomes-based framework of physician competencies. Med Teach. 2007;29(7):642–7.

12. Swing S. Assessing the ACGME general competencies: general considerations and assessment methods. Acad Emerg Med. 2002;9(11):1278–88.

13. Frank J. The CanMEDS 2005 Physician Competency Framework. Better standards. Better physicians. Better Care. [Internet]. Ottawa; 2005. Available from: http://www.royalcollege.ca/portal/page/portal/rc/common/documents/canmeds/resources/publications/framework_full_e.pdf

14. Frank J, Snell L, Sherbino J. CanMEDS 2015 Physician Competency Framework. Ottawa; 2015.

15. Dath D, Chan M, Anderson G, Burke A, Razack S, Lieff S. Leader. In: Frank J, Snell L, Sherbino J, editors. CanMEDS 2015 Physician Competency Framework. Ottawa; 2015.

16. Dath D, Chan M, Abbott C. CanMEDS 2015: From Manager to Leader. Ottawa; 2015.

17. Busari J. Longitudinal curriculum for leadership devt. Unpublished manuscript. 2014.

18. Berkenbosch L, Brouns JWM, Heyligers I, Busari JO. How Dutch medical residents perceive their competency as manager in the revised postgraduate medical curriculum. Postgrad Med J. 2011;87(1032):680–7.

19. Berkenbosch L, Bax M, Scherpbier A, Heyligers I, Muijtjens AMM, Busari JO. How Dutch medical specialists perceive the competencies and training needs of medical residents in health care management. Med Teach [Internet]. 2013;35(4):e1090–102. Available from: http://www.ncbi.nlm.nih.gov/pubmed/23137237

20. Nelson E. Teaching law to students in the health care professions. Health Law Rev. 2003;11(2):8–19.

21. Sharma N, Lau CS, Doherty I, Harbutt D. How we flipped the medical classroom. Med Teach. 2015;37(4):327–30.

22. Moffett J. Twelve tips for "flipping" the classroom. Med Teach [Internet]. 2015;37(4):331–6. Available from: http://www.ncbi.nlm.nih.gov/pubmed/25154646

23. Mazur E. Farewell lecture. J Tokyo Med Univ. 2012;70(2):141–67.

24. van den Berg EEP, Bracey A, van Driel APG, Geijsel FEC, Manders S. Modular continuing professional development for emergency physicians – the MNSHA masterclass programme. Eur J Emerg Med [Internet]. 2015;1. Available from: http://content.wkhealth.com/linkback/openurl?sid=WKPTLP:landingpage&an=00063110-900000000-99451

25. McLaughlin JE, Roth MT, Glatt DM, Gharkholonarehe N, Davidson CA, Griffin LM, et al. The Flipped Classroom: A course redesign to foster learning and engagement in a health professions school. Acad Med [Internet]. 2014;89(2):236–43. Available from: http://content.wkhealth.com/linkback/openurl?sid=WKPTLP:landingpage&an=00001888-201402000-00017

26. Kerfoot B, Conlin P, Travison T, McMahon G. Web-Based Education in Systems-Based Practice. 2016;167.

27. Lowell J, Utah B, Verleger MA, Beach D. The Flipped Classroom: A Survey of the Research The Flipped Classroom: A Survey of the Research. Proceedings Annu Conf Am Soc Eng Educ. 2013;6219.

28. Galway LP, Corbett KK, Takaro TK, Tairyan K, Frank E. A novel integration of online and flipped classroom instructional models in public health higher education. BMC Med Educ [Internet]. 2014;14(1):181. Available from: http://www.biomedcentral.com/1472-6920/14/181

29. Bishop L, Verleger M. The Flipped Classroom: A Survey of the Research. Proceedings Annu Conf Am Soc Eng Educ [Internet]. 2013;6219. Available from: http://www.asee.org/public/conferences/20/papers/6219/view

30. Krathwohl D, Anderson LW. A Revision of Bloom's Taxonomy: An Overview. Am J Psychol. 2009;122(1):39–52.

31. Kurup V, Hersey D. The changing landscape of anesthesia education: is Flipped Classroom the answer? Curr Opin Anaesthesiol [Internet]. 2013;26(6):726–31. Available from: http://www.ncbi.nlm.nih.gov/pubmed/24126692

32. Brouns JW, Berkenbosch L, Ploemen-Suijker FD, Heyligers I, Busari JO. Medical residents perceptions of the need for management education in the postgraduate curriculum: a preliminary study. Int J Med Educ [Internet]. 2010; 1:76–82. Available from: http://www.ijme.net/archive/1/residents-perceptions-of-management-education

33. Lucardie AT, Berkenbosch L, van den Berg J, Busari JO. Flipping the classroom to teach Millennial residents medical leadership: a proof of concept. Advances in Medical Education and Practice. 2017:8 57–61. Available from: https://www.dovepress.com/flipping-the-classroom-to-teach-millennial-residents-medical-leadershi-peer-reviewed-article-AMEP

34. Lockyer J, Ward R, Toews J. Twelve tips for effective short course design. Med Teach [Internet]. 2005;27(5):392–5. Available from: http://www.ncbi.nlm.nih.gov/pubmed/16147790

35. Berkenbosch L, Muijtjens AMM, Zimmermann LJI, Heyligers IC, Scherpbier AJJA, Busari JO. A pilot study of a practice management training module for medical residents. BMC Med Educ [Internet]. 2014;14(1):107. Available from: http://www.pubmedcentral.nih.gov/articlerender.fcgi?artid=4038828&tool=pmcentrez&rendertype=abstract

36. Fick U. An introduction to qualitative research. Second. London: Sage Publishers; 2002. p.176-195

37. Butt A. Student views on the use of lecture time and their experience with a flipped classroom approach. Bus Educ Accredit. 2014;6(1):33–43.

38. Rowe M, Frantz J, Bozalek V. Beyond knowledge and skills: the use of a Delphi study to develop a technology-mediated teaching strategy. BMC Med Educ [Internet]. 2013; 13:51. Available from: http://www.pubmedcentral.nih.gov/articlerender.fcgi?artid=3635913&tool=pmcentrez&rendertype=abstract

© 2017 by the authors. Submitted for possible open access publication under the
terms and conditions of the Creative Commons Attribution (CC BY) license (http://creativecommons.org/licenses/by/4.0/).
